# Supplementary material for: DataTri, a database of American triatomine species occurrence
Source: PubMed Central journal article supplement (PMC5914284; doi:10.1038/sdata.2018.71), 2018-04-24
Supplement: sdata201871-s2.pdf [file sdata201871-s2.pdf]

## Supplementary Material

**Table 1.** Systematics of the 150 extant species and the two fossils currently described according to the classification of Justi & Galvao<sup>1</sup>. The chart includes taxonomic and geographical information. The "x" indicates the 135 species present in *DataTri*.

| Tribu           | Triatomine species               | Species included in <i>DataTri</i> | Continent | Author/s                                                                  |
|-----------------|----------------------------------|------------------------------------|-----------|---------------------------------------------------------------------------|
| Alberproseniini | <i>Alberprosenia goyovargasi</i> | x                                  | America   | Martínez & Carcavallo, 1977                                               |
|                 | <i>A. malheiroi</i>              | x                                  | America   | Serra, Atzingen & Serra, 1980                                             |
| Bolboderini     | <i>Belminus corredori</i>        | x                                  | America   | Galvão & Angulo, 2006                                                     |
|                 | <i>B. costaricensis</i>          | x                                  | America   | Herrer, Lent & Wygodzinsky, 1954                                          |
|                 | <i>B. ferroae</i>                | x                                  | America   | Sandoval, Pabón, Jurberg and Galvão 2007                                  |
|                 | <i>B. herreri</i>                | x                                  | America   | Lent & Wygodzinsky, 1979                                                  |
|                 | <i>B. laportei</i>               | x                                  | America   | Lent, Jurberg & Carcavallo, 1995                                          |
|                 | <i>B. peruvianus</i>             | x                                  | America   | Herrer, Lent & Wygodzinsky, 1954                                          |
|                 | <i>B. pittieri</i>               | x                                  | America   | Osuna & Ayala, 1993                                                       |
|                 | <i>B. rugulosus</i>              | x                                  | America   | Stål, 1859                                                                |
|                 | <i>Bolbodera scabrosa</i>        | -                                  | America   | Valdés, 1910                                                              |
|                 | <i>Microtriatoma borbai</i>      | x                                  | America   | Lent & Wygodzinsky, 1979                                                  |
|                 | <i>M. trinidadensis</i>          | x                                  | America   | (Lent, 1951)                                                              |
|                 | <i>Parabelminus carioca</i>      | x                                  | America   | Lent, 1943                                                                |
|                 | <i>P. yurupucu</i>               | x                                  | America   | Lent & Wygodzinsky, 1979                                                  |
| Cavernicolini   | <i>Cavernicola lenti</i>         | x                                  | America   | Barrett & Arias, 1985                                                     |
|                 | <i>C. pilosa</i>                 | x                                  | America   | Barber, 1937                                                              |
| Rhodniini       | <i>Psammolestes arthuri</i>      | x                                  | America   | (Pinto, 1926)                                                             |
|                 | <i>P. coreodes</i>               | x                                  | America   | Bergroth, 1911                                                            |
|                 | <i>P. tertius</i>                | x                                  | America   | Lent & Jurberg, 1965                                                      |
|                 | <i>Rhodnius amazonicus</i>       | x                                  | America   | Almeida, Santos & Sposina, 1973                                           |
|                 | <i>R. barretti</i>               | x                                  | America   | Abad-Franch, Pavan, Jaramillo, Palomeque, Dale, Chaverra & Monteiro, 2013 |
|                 | <i>R. brethesi</i>               | x                                  | America   | Matta, 1919                                                               |
|                 | <i>R. colombiensis</i>           | x                                  | America   | Mejia, Galvão & Jurberg, 1999                                             |
|                 | <i>R. dalessandroi</i>           | x                                  | America   | Carcavallo & Barreto, 1976                                                |
|                 | <i>R. domesticus</i>             | x                                  | America   | Neiva & Pinto, 1923                                                       |

|            |                                |   |         |                                                                                                                                                |
|------------|--------------------------------|---|---------|------------------------------------------------------------------------------------------------------------------------------------------------|
|            | <i>R. ecuadoriensis</i>        | x | America | Lent & León, 1958                                                                                                                              |
|            | <i>R. milesi</i>               | x | America | Carcavallo, Rocha, Galvão & Jurberg, 2001 (in: Valente et al. 2001)                                                                            |
|            | <i>R. marabaensis</i>          | x | America | dos Santos Souza, Barbosa Von Atzingen, Furtado, de Oliveira, Damieli Nascimento, Pagotto Vendrami, Aristeu da Rosa 2016                       |
|            | <i>R. montenegrensis</i>       | x | America | Rosa, Rocha, Gardim, Pinto, Mendonça, Ferreira Filho, Carvalho, Camargo, Oliveira, Nascimento, Cilense, Almeida, 2012                          |
|            | <i>R. nasutus</i>              | x | America | Stål, 1859                                                                                                                                     |
|            | <i>R. neglectus</i>            | x | America | Lent, 1954                                                                                                                                     |
|            | <i>R. neivai</i>               | x | America | Lent, 1953                                                                                                                                     |
|            | <i>R. pallescens</i>           | x | America | Barber, 1932                                                                                                                                   |
|            | <i>R. paraensis</i>            | x | America | Sherlock, Guitton & Miles, 1977                                                                                                                |
|            | <i>R. pictipes</i>             | x | America | Stål, 1872                                                                                                                                     |
|            | <i>R. prolixus</i>             | x | America | Stål, 1859                                                                                                                                     |
|            | <i>R. robustus</i>             | x | America | Larrousse, 1927                                                                                                                                |
|            | <i>R. stali</i>                | x | America | Lent, Jurberg & Galvão, 1993                                                                                                                   |
|            | <i>R. taquarussuensis</i>      | x | America | da Rosa, Garcia Justino, Nascimento, Mendonça, Rocha, Blanco de Carvalho, Falcone, Vilela de Azeredo-Oliveira, Chaboli Alevi, de Oliveira 2017 |
|            | <i>R. zeledoni</i>             | x | America | Jurberg, Rocha, Galvão, 2009                                                                                                                   |
| Triatomini | <i>Dipetalogaster maxima</i>   | x | America | (Uhler, 1894)                                                                                                                                  |
|            | <i>Eratyrus cuspidatus</i>     | x | America | Stål, 1859                                                                                                                                     |
|            | <i>E. mucronatus</i>           | x | America | Stål, 1859                                                                                                                                     |
|            | <i>Hermanlenticia matsunoi</i> | x | America | (Fernández-Loayza, 1989)                                                                                                                       |
|            | <i>Linshcosteus carnifex</i>   | - | Asia    | Distant, 1904                                                                                                                                  |
|            | <i>L. chota</i>                | - | Asia    | Lent & Wygodzinsky, 1979                                                                                                                       |
|            | <i>L. confumus</i>             | - | Asia    | Ghuri, 1976                                                                                                                                    |
|            | <i>L. costalis</i>             | - | Asia    | Ghuri, 1976                                                                                                                                    |
|            | <i>L. kali</i>                 | - | Asia    | Lent & Wygodzinsky, 1979                                                                                                                       |
|            | <i>L. karupus</i>              | - | Asia    | Galvão, Patterson, Rocha & Jurberg, 2002                                                                                                       |

|                             |   |         |                                                                                                |
|-----------------------------|---|---------|------------------------------------------------------------------------------------------------|
| <i>Mepraia gajardoi</i>     | x | America | Frias, Henry & Gonzalez, 1998                                                                  |
| <i>M. parapatrica</i>       | x | America | Frias-Lasserre 2010                                                                            |
| <i>M. spinolai</i>          | x | America | (Porter, 1934)                                                                                 |
| <i>Panstrongylus chinai</i> | x | America | (Del Ponte, 1929)                                                                              |
| <i>P. diasi</i>             | x | America | Pinto & Lent, 1946                                                                             |
| <i>P. geniculatus</i>       | x | America | (Latreille, 1811)                                                                              |
| <i>P. guentheri</i>         | x | America | Berg, 1879                                                                                     |
| <i>P. howardi</i>           | x | America | (Neiva, 1911)                                                                                  |
| <i>P. humeralis</i>         | x | America | (Usinger, 1939)                                                                                |
| <i>P. lenti</i>             | x | America | Galvão & Palma, 1968                                                                           |
| <i>P. lignarius</i>         | x | America | (Walker, 1873)                                                                                 |
| <i>P. lutzi</i>             | x | America | (Neiva & Pinto, 1923)                                                                          |
| <i>P. martinezorum</i>      | x | America | Ayala 2009                                                                                     |
| <i>P. megistus</i>          | x | America | (Burmeister, 1835)                                                                             |
| <i>P. mitarakaensis</i>     | x | America | (Bérenger & Blanchet 2007)                                                                     |
| <i>P. rufotuberculatus</i>  | x | America | (Champion, 1899)                                                                               |
| <i>P. tupynambai</i>        | x | America | Lent, 1942                                                                                     |
| <i>Paratriatoma hirsuta</i> | x | America | Barber, 1938                                                                                   |
| <i>Triatoma amicitiae</i>   | - | Asia    | Lent, 1951                                                                                     |
| <i>T. arthurneivai</i>      | x | America | Lent & Martins, 1940                                                                           |
| <i>T. bahiensis</i>         | x | America | Sherlock & Serafim, 1967                                                                       |
| <i>T. baratai</i>           | x | America | Carcavallo & Jurberg, 2000                                                                     |
| <i>T. barberi</i>           | x | America | Usinger, 1939                                                                                  |
| <i>T. bassolsae</i>         | x | America | (Alejandre Aguilar, Noguera Torres, Cortéz Jimenez, Jurberg, Galvão & Carcavallo, 1999)        |
| <i>T. bolivari</i>          | x | America | Carcavallo, Martínez & Pelaez, 1987                                                            |
| <i>T. boliviana</i>         | x | America | Martínez Avendaño, Chávez Espada, Gil, Aranda Asturizaga, Vargas Mamani, Vidaurre Prieto, 2007 |
| <i>T. bouvieri</i>          | - | Asia    | Larrousse, 1924                                                                                |
| <i>T. brailovskyi</i>       | x | America | Martínez, Carcavallo & Pelaez, 1984                                                            |
| <i>T. brasiliensis</i>      | x | America | Neiva, 1911                                                                                    |

|                          |   |         |                                                                           |
|--------------------------|---|---------|---------------------------------------------------------------------------|
| <i>T. breyeri</i>        | x | America | Del Ponte, 1929                                                           |
| <i>T. bruneri</i>        | x | America | Usinger, 1944                                                             |
| <i>T. carcavalloii</i>   | x | America | Jurberg, Rocha & Lent, 1998                                               |
| <i>T. carrioni</i>       | x | America | Larrousse, 1926                                                           |
| <i>T. cavernicola</i>    | - | Asia    | Else & Cheong, 1977                                                       |
| <i>T. circummaculata</i> | x | America | (Stål, 1859)                                                              |
| <i>T. costalimai</i>     | x | America | Verano & Galvão, 1958                                                     |
| <i>T. deaneorum</i>      | x | America | Galvão, Souza & Lima, 1967                                                |
| <i>T. delpontei</i>      | x | America | Romaña & Abalos, 1947                                                     |
| <i>T. dimidiata</i>      | x | America | (Latreille, 1811)                                                         |
| <i>T. dispar</i>         | x | America | Lent, 1950                                                                |
| <i>T. eratyrsiformis</i> | x | America | Del Ponte, 1929                                                           |
| <i>T. flavida</i>        | x | America | (Neiva, 1911)                                                             |
| <i>T. garciabesi</i>     | x | America | Carcavallo, Cichero, Martínez, Prosen & Ronderos, 1967                    |
| <i>T. gerstaeckeri</i>   | x | America | (Stål, 1859)                                                              |
| <i>T. gomeznunezi</i>    | x | America | Martínez, Carcavallo & Jurberg, 1994                                      |
| <i>T. guasayana</i>      | x | America | Wygodzinsky & Abalos, 1949                                                |
| <i>T. guazu</i>          | x | America | Lent & Wygodzinsky, 1979                                                  |
| <i>T. hegneri</i>        | x | America | Mazzotti, 1940                                                            |
| <i>T. incrassata</i>     | x | America | Usinger, 1939                                                             |
| <i>T. indictiva</i>      | x | America | Neiva, 1912                                                               |
| <i>T. infestans</i>      | x | America | (Klug, 1834)                                                              |
| <i>T. jatai</i>          | x | America | Gonçalves, Teves-Neves, Santos-Mallet, Carbajal de la Fuente, Lopes, 2013 |
| <i>T. juazeirensis</i>   | x | America | Costa y Felix, 2007                                                       |
| <i>T. jurbergi</i>       | x | America | Carcavallo, Galvão & Lent, 1998                                           |
| <i>T. klugi</i>          | x | America | Carcavallo, Jurberg, Lent & Galvão, 2001                                  |
| <i>T. lecticularia</i>   | x | America | (Stål, 1859)                                                              |
| <i>T. lenti</i>          | x | America | Sherlock & Serafim, 1967                                                  |
| <i>T. leopoldi</i>       | - | Asia    | (Schoudeten, 1933)                                                        |
| <i>T. limai</i>          | x | America | Del Ponte, 1929                                                           |

|                          |   |              |                                                                                             |
|--------------------------|---|--------------|---------------------------------------------------------------------------------------------|
| <i>T. longipennis</i>    | x | America      | (Usinger, 1939)                                                                             |
| <i>T. maculata</i>       | x | America      | (Erichson, 1848)                                                                            |
| <i>T. matogrossensis</i> | x | America      | Leite & Barbosa, 1953                                                                       |
| <i>T. mazzottii</i>      | x | America      | (Usinger, 1941)                                                                             |
| <i>T. melanica</i>       | x | America      | Neiva & Lent, 1941                                                                          |
| <i>T. melanocephala</i>  | x | America      | Neiva & Pinto, 1923                                                                         |
| <i>T. mexicana</i>       | x | America      | (Herrich-Schaeffer, 1848)                                                                   |
| <i>T. migrans</i>        | - | Asia         | Breddie, 1903                                                                               |
| <i>T. neotomae</i>       | x | America      | Neiva, 1911                                                                                 |
| <i>T. nigromaculata</i>  | x | America      | (Stål, 1872)                                                                                |
| <i>T. nitida</i>         | x | America      | Usinger, 1939                                                                               |
| <i>T. obscura</i>        | - | America      | Maldonado & Farr, 1962                                                                      |
| <i>T. oliveirai</i>      | x | America      | (Neiva, Pinto & Lent, 1939)                                                                 |
| <i>T. pallidipennis</i>  | x | America      | (Stål, 1872)                                                                                |
| <i>T. patagonica</i>     | x | America      | Del Ponte, 1929                                                                             |
| <i>T. peninsularis</i>   | x | America      | Usinger, 1940                                                                               |
| <i>T. petrochiae</i>     | x | America      | Pinto & Barreto, 1925                                                                       |
| <i>T. phyllosoma</i>     | x | America      | (Burmeister, 1835)                                                                          |
| <i>T. picturata</i>      | x | America      | (Usinger, 1939)                                                                             |
| <i>T. pintodiasi</i>     | x | America      | Jurberg, Cunha, Cailleaux, Raigorodski, Souza Lima, da Silva Roch, Figueiredo Moreira, 2013 |
| <i>T. platensis</i>      | x | America      | Neiva, 1913                                                                                 |
| <i>T. protracta</i>      | x | America      | (Uhler, 1894)                                                                               |
| <i>T. pseudomaculata</i> | x | America      | Corrêa & Espínola, 1964                                                                     |
| <i>T. pugasi</i>         | - | Asia         | Lent, 1953                                                                                  |
| <i>T. recurva</i>        | x | America      | (Stål, 1868)                                                                                |
| <i>T. rubida</i>         | x | America      | (Uhler, 1894)                                                                               |
| <i>T. rubrofasciata</i>  | x | America/Asia | (De Geer, 1773)                                                                             |
| <i>T. rubrovaria</i>     | x | America      | (Blanchard, 1843)                                                                           |
| <i>T. ryckmani</i>       | x | America      | Zeledón & Ponce, 1972                                                                       |
| <i>T. sanguisuga</i>     | x | America      | (Leconte, 1855)                                                                             |
| <i>T. sherlocki</i>      | x | America      | Papa, Jurberg, Carcavallo, Cerqueira & Barata, 2002                                         |

|         |                         |   |         |                                                          |
|---------|-------------------------|---|---------|----------------------------------------------------------|
|         | <i>T. sinaloensis</i>   | x | America | Ryckman, 1962                                            |
|         | <i>T. sinica</i>        | - | Asia    | Hsiao, 1965                                              |
|         | <i>T. sordida</i>       | x | America | (Stål, 1859)                                             |
|         | <i>T. tibiamaculata</i> | x | America | (Pinto, 1926)                                            |
|         | <i>T. vandae</i>        | x | America | Carcavallo, Jurberg, Rocha, Galvão, Noireau & Lent, 2002 |
|         | <i>T. venosa</i>        | x | America | (Stål, 1872)                                             |
|         | <i>T. vitticeps</i>     | x | America | (Stål, 1859)                                             |
|         | <i>T. williami</i>      | x | America | Galvão, Souza & Lima, 1965                               |
|         | <i>T. wygodzinskyi</i>  | x | America | Lent 1951                                                |
| Fossils | <i>P. hispaniolae</i>   | - | America | Poinar 2013                                              |
|         | <i>T. dominicana</i>    | - | America | Poinar 2005                                              |

## References

1. Justi, S. A. & Galvão, C. The Evolutionary Origin of Diversity in Chagas Disease Vectors. *Trends Parasitol.* **33**, 42–52 (2017).
